# Supplementary material for: Atomic defects in monolayer ordered double transition metal carbide (Mo2TiC2Tx) MXene and CO2 adsorption
Source: Royal Society of Chemistry journal article supplement (doi:10.1039/c9tc06046d), 2020-01-01
Supplement: c9tc06046d1.pdf [file c9tc06046d1.pdf]

## Atomic defects in monolayer ordered double transition metals carbide ( $\text{Mo}_2\text{TiC}_2\text{T}_x$ ) MXene and $\text{CO}_2$ Activation

Rasoul Khaledialidusti,<sup>\*a</sup> Abhishek Kumar Mishra,<sup>b</sup> Afroz Barnoush<sup>a,c</sup>

<sup>a</sup>Department of Mechanical and Industrial Engineering, Norwegian University of Science and Technology (NTNU), 7491 Trondheim, Norway. E-mail: [rasoul.khaledialidusti@ntnu.no](mailto:rasoul.khaledialidusti@ntnu.no)

<sup>b</sup> Department of Physics, School of Engineering, University of Petroleum and Energy Studies, Bidholi via Premnagar, Dehradun 248007, INDIA.

<sup>c</sup>Curtin Corrosion Centre, WASM-MECE, Curtin University, Australia.

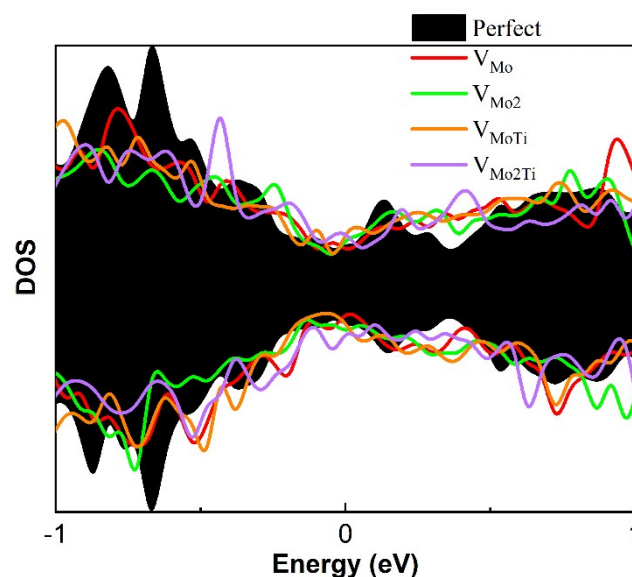

**Fig. S1** Calculated total density of states (DOS) of perfect and defected  $\text{Mo}_2\text{TiC}_2$  MXene.

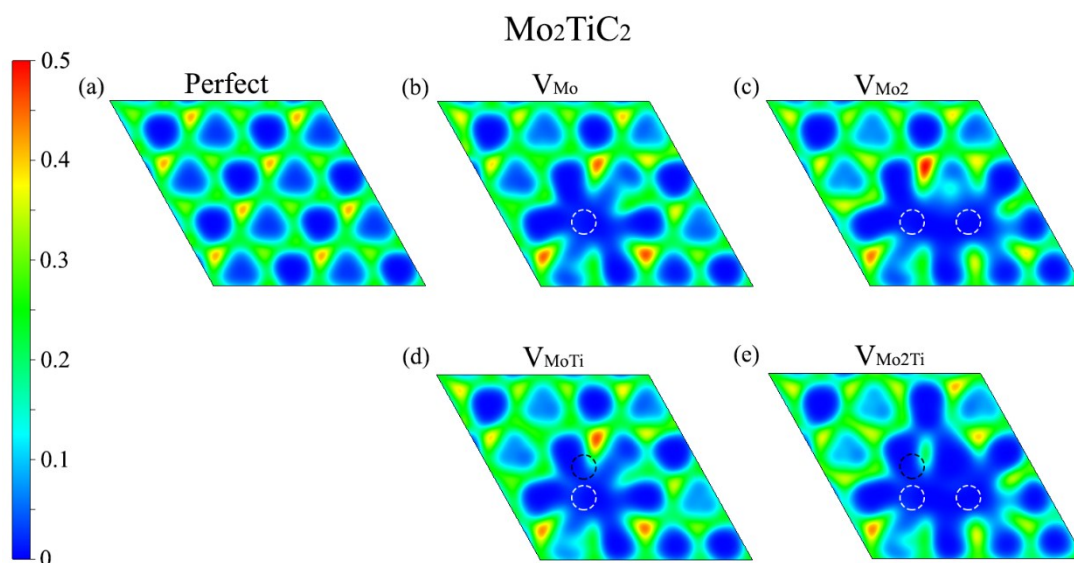

**Fig. S2** Electron localization function (ELF) on the plane perpendicular to the  $c$ -axis at the close distance on top of surface terminations of the defected  $\text{Mo}_2\text{TiC}_2$  MXenes. Dash circle lines highlight the place of the removed atoms.

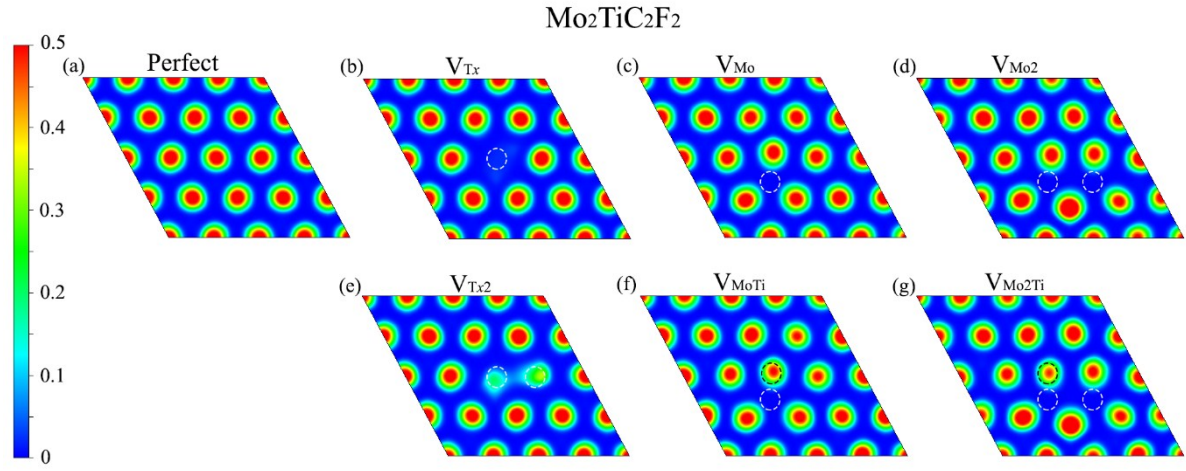

**Fig. S3** Electron localization function (ELF) on the plane perpendicular to the  $c$ -axis at the close distance on top of surface terminations of the defected  $\text{Mo}_2\text{TiC}_2\text{F}_2$  MXenes. Dash circle lines highlight the place of the removed atoms.

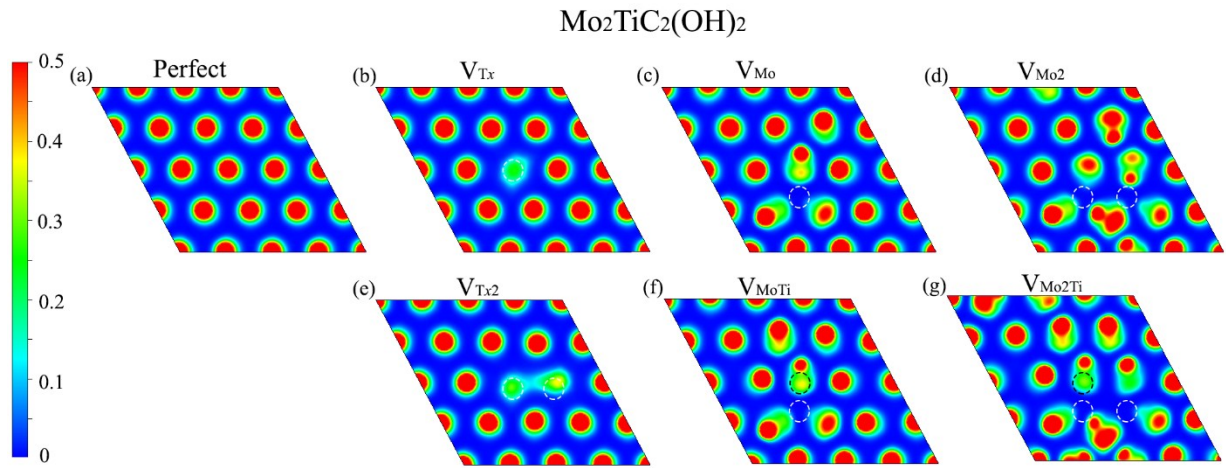

**Fig. S4** Electron localization function (ELF) on the plane perpendicular to the  $c$ -axis at the close distance on top of surface terminations of the defected  $\text{Mo}_2\text{TiC}_2(\text{OH})_2$  MXenes. Dash circle lines highlight the place of the removed atoms.

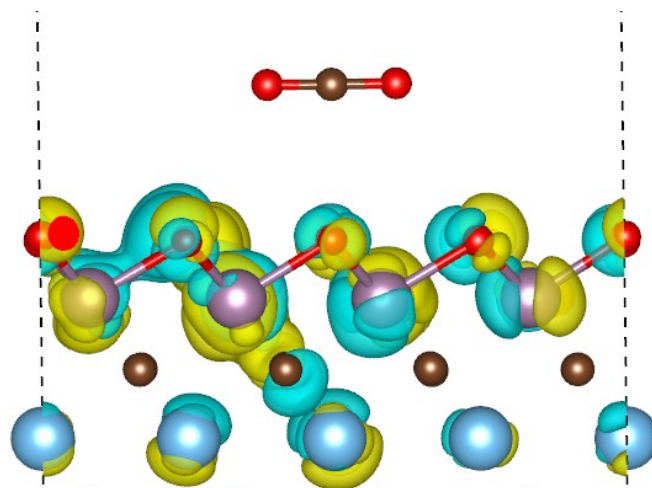

**Fig. S5** Electronic density difference plot of CO<sub>2</sub> adsorption structures on MXene-V<sub>Tx</sub> surface, showing no charge transfer in the regions between the CO<sub>2</sub> and the surface atoms since the molecule is not chemisorbed.
